# Supplementary material
Source: Copernicus journal article supplement (doi:10.5194/gmd-19-1833-2026)
Supplement: Supplementary file [file gmd-19-1833-2026-supplement-title-page.pdf › gmd-19-1833-2026-supplement-title-page.pdf]

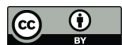

## *Supplement of*

# **Deposition velocity concept does not apply to fluxes of ambient aerosol**

**Rostislav Kouznetsov et al.**

*Correspondence to:* Rostislav Kouznetsov (rostislav.kouznetsov@fmi.fi)

- gmd-19-1833-2026-supplement-title-page.pdf
- Supplement
  - 00README.md
  - 25mFluxes
    - \* NH4NO3Sea-coarseV-rh-tau0s-.2min.png
    - \* NH4NO3Sea-coarseV-rh-tau0s-.5min.png
    - \* NH4NO3Sea-coarseV-rh-tau0s-01min.png
    - \* NH4NO3Sea-coarseV-rh-tau0s-02min.png
    - \* NH4NO3Sea-coarseV-rh-tau0s-05min.png
    - \* NH4NO3Sea-coarseV-rh-tau0s-10min.png
    - \* NH4NO3Sea-coarseV-rh-tau0s-15min.png
    - \* NH4NO3Sea-coarseV-rh-tau0s-30min.png
    - \* NH4NO3Sea-coarseV-rh-tau1000s-.2min.png
    - \* NH4NO3Sea-coarseV-rh-tau1000s-.5min.png
    - \* NH4NO3Sea-coarseV-rh-tau1000s-01min.png
    - \* NH4NO3Sea-coarseV-rh-tau1000s-02min.png
    - \* NH4NO3Sea-coarseV-rh-tau1000s-05min.png
    - \* NH4NO3Sea-coarseV-rh-tau1000s-10min.png
    - \* NH4NO3Sea-coarseV-rh-tau1000s-15min.png
    - \* NH4NO3Sea-coarseV-rh-tau1000s-30min.png
    - \* NH4NO3Sea-coarseV-rh-tau100s-.2min.png
    - \* NH4NO3Sea-coarseV-rh-tau100s-.5min.png
    - \* NH4NO3Sea-coarseV-rh-tau100s-01min.png
    - \* NH4NO3Sea-coarseV-rh-tau100s-02min.png
    - \* NH4NO3Sea-coarseV-rh-tau100s-05min.png
    - \* NH4NO3Sea-coarseV-rh-tau100s-10min.png
    - \* NH4NO3Sea-coarseV-rh-tau100s-15min.png
    - \* NH4NO3Sea-coarseV-rh-tau100s-30min.png
    - \* NH4NO3Sea-coarseV-rh-tau100s-.2min.png

- \* NH4NO3Sea-coarseV-rh-tau100s-.5min.png
- \* NH4NO3Sea-coarseV-rh-tau100s-01min.png
- \* NH4NO3Sea-coarseV-rh-tau100s-02min.png
- \* NH4NO3Sea-coarseV-rh-tau100s-05min.png
- \* NH4NO3Sea-coarseV-rh-tau100s-10min.png
- \* NH4NO3Sea-coarseV-rh-tau100s-15min.png
- \* NH4NO3Sea-coarseV-rh-tau100s-30min.png
- \* NH4NO3Sea-rh-tau0s-.2min.png
- \* NH4NO3Sea-rh-tau0s-.5min.png
- \* NH4NO3Sea-rh-tau0s-01min.png
- \* NH4NO3Sea-rh-tau0s-02min.png
- \* NH4NO3Sea-rh-tau0s-05min.png
- \* NH4NO3Sea-rh-tau0s-10min.png
- \* NH4NO3Sea-rh-tau0s-15min.png
- \* NH4NO3Sea-rh-tau0s-30min.png
- \* NH4NO3Sea-rh-tau10000s-.2min.png
- \* NH4NO3Sea-rh-tau10000s-.5min.png
- \* NH4NO3Sea-rh-tau10000s-01min.png
- \* NH4NO3Sea-rh-tau10000s-02min.png
- \* NH4NO3Sea-rh-tau10000s-05min.png
- \* NH4NO3Sea-rh-tau10000s-10min.png
- \* NH4NO3Sea-rh-tau10000s-15min.png
- \* NH4NO3Sea-rh-tau10000s-30min.png
- \* NH4NO3Sea-rh-tau1000s-.2min.png
- \* NH4NO3Sea-rh-tau1000s-.5min.png
- \* NH4NO3Sea-rh-tau1000s-01min.png
- \* NH4NO3Sea-rh-tau1000s-02min.png
- \* NH4NO3Sea-rh-tau1000s-05min.png
- \* NH4NO3Sea-rh-tau1000s-10min.png
- \* NH4NO3Sea-rh-tau1000s-15min.png
- \* NH4NO3Sea-rh-tau1000s-30min.png
- \* NH4NO3Sea-rh-tau100s-.2min.png
- \* NH4NO3Sea-rh-tau100s-.5min.png
- \* NH4NO3Sea-rh-tau100s-01min.png
- \* NH4NO3Sea-rh-tau100s-02min.png
- \* NH4NO3Sea-rh-tau100s-05min.png
- \* NH4NO3Sea-rh-tau100s-10min.png
- \* NH4NO3Sea-rh-tau100s-15min.png
- \* NH4NO3Sea-rh-tau100s-30min.png

The copyright of individual parts of the supplement might differ from the article licence.
